# Supplementary material
Source: MDPI journal article supplement (https://www.mdpi.com/1996-1073/9/4/227)
Supplement: s1 [file s1]

# Supplementary Material: A Methodology for Constructing Marginal Abatement Cost Curves for Climate Action in Cities

Nadine Ibrahim and Christopher Kennedy

## Sensitivity Analysis

Inherent in the construction of the MAC curves, and in the methodology for determining marginal abatement costs and abatement potentials are numerous assumptions and uncertainties. A sensitivity analysis is useful to offer a measure of the uncertainty, and is limited here to discount rate, being one of the main parameters driving cost-effectiveness calculations, as summarized in Table S1.

**Table S1.** Sensitivity of the discount rate on the lowest and highest cost-effectiveness of the mitigation measures on the MAC curve.

| Parameter                                 | Impact on Lowest and Highest Cost-Effectiveness |       |      |      |      |       |      |      |
|-------------------------------------------|-------------------------------------------------|-------|------|------|------|-------|------|------|
|                                           | 3%                                              |       | 4%   |      | 6%   |       | 7%   |      |
| Discount rate                             | low                                             | high  | low  | high | low  | high  | low  | high |
| Cost-Effectiveness (\$/tCO <sub>2</sub> ) | -697                                            | 2052  | -677 | 2222 | -642 | 2,540 | -626 | 2692 |
| (Baseline at 5%) Low                      |                                                 |       |      |      |      | -658  |      |      |
| (Baseline at 5%) High                     |                                                 |       |      |      |      | 2384  |      |      |
| % change                                  | 5.9                                             | -13.9 | 2.9  | -6.8 | -2.4 | 6.5   | -4.9 | 12.9 |

As the discount rate decreases, mitigation measures offering financial savings appear to offer more savings, and measures that are not economically viable appear to be more attainable. The opposite is true as the discount rate increases, where mitigation measures offer financial savings, they appear to offer less, and costly measures appear less viable.

It is worthwhile to note that sensitivity of the results to the discount rate does not change the prioritization of the mitigation measures but only makes them, as a whole package, more or less financially attractive. However, assessing the sensitivity to other measures of a financial nature including the price of electricity, natural gas, gasoline, and diesel would be worthwhile particularly that the reprioritizing of the mitigation measures analyzed may have useful policy implications to consider. However, the MAC curve model in its current form does not support reprioritization for changing input prices, but rather prices are held constant throughout the analysis. Likewise, sensitivity for the input data for capital costs of the mitigation measures and reference technology is not possible on a measure-by-measure basis. The baseline prices used in the MAC curve calculations are as follows:

- electricity for residential application: 10.4 cents/kWh
- electricity for commercial application: 12.2 cents/kWh
- natural gas for residential application: 40.6 cents/m<sup>3</sup>
- natural gas for commercial application: 30.7 cents/m<sup>3</sup>
- gasoline: 128.5 cents/L
- diesel: 124.8 cents/L

**Table S2.** Economic costs and GHG emission inputs of mitigation measures in the energy supply sector.

| No. | Mitigation Measure        | Reference Technology Including Specifications | Life (years) | Capacity Utilization               | Economic Cost Inputs and Assumptions                                                                                                            | References for Economic Costs and Lifetime | Emission Factor (gCO <sub>2e</sub> /kWh) | References for Energy Savings |
|-----|---------------------------|-----------------------------------------------|--------------|------------------------------------|-------------------------------------------------------------------------------------------------------------------------------------------------|--------------------------------------------|------------------------------------------|-------------------------------|
| 0   | SCGT (Fossil Fuel)        | Baseline Technology                           | 20           | Capacity Utilization: 7400 h (Max) | \$665 (2008)/kW (Capital)<br>\$16.0 (2008)/kW (Fixed O&M)<br>\$3.5 (2008)/MWh (Variable O&M)<br>\$8.9 USD(2010)/GJ (Average Fuel Price)         | [1,2]                                      | 370 (Median direct emissions)            | [2]                           |
| 1   | Biogas (Biofuel)          | SCGT                                          | 20           | Capacity Utilization: 7000 h (Max) | \$2096 (2008)/kW (Capital Cost)<br>\$231.0 (2008)/kW (Fixed O&M)<br>\$27.0 (2008)/MWh (Variable O&M)<br>\$6.3 USD(2010)/GJ (Average Fuel Price) | [1,2]                                      | 0                                        | [2]                           |
| 2   | Hydropower RR (Renewable) | SCGT                                          | 50           | Capacity Utilization: 7900 h (Max) | \$3570 (2008)/kW (Capital)<br>\$41.8 (2008)/kW (Fixed O&M)<br>\$0 (2008)/MWh (Variable O&M)                                                     | [1]                                        | 0                                        | [2]                           |
| 3   | Hydro DIS (Renewable)     | SCGT                                          | 50           | Capacity Utilization: 7900 h (Max) | \$2550 (2008)/kW (Capital)<br>\$41.8 (2008)/kW (Fixed O&M)<br>\$0 (2008)/MWh (Variable O&M)                                                     | [1]                                        | 0                                        | [2]                           |
| 4   | Nuclear                   | SCGT                                          | 40           | Capacity Utilization: 7400 h (Max) | \$2907 (2008)/kW (Capital)<br>\$108.1 (2008)/kW (Fixed O&M)<br>\$3.1 (2008)/MWh (Variable O&M)<br>\$0.805 USD(2010)/GJ (Average Fuel Price)     | [1,2]                                      | 0                                        | [2]                           |
| 5   | Wind (Renewable)          | SCGT                                          | 20           | Capacity Utilization: 3500 h(Max)  | \$1938 (2008)/kW (Capital)<br>\$47.9 (2008)/kW (Fixed O&M)<br>\$0 (2008)/MWh (Variable O&M)                                                     | [1]                                        | 0                                        | [2]                           |
| 6   | Solar (Renewable)         | SCGT                                          | 20           | Capacity Utilization: 2400 h (Max) | \$5712 (2008)/kW (Capital)<br>\$13.3 (2008)/kW (Fixed O&M)<br>\$0 (2008)/MWh (Variable O&M)                                                     | [1]                                        | 0                                        | [2]                           |

1. If not stated otherwise, costs are in Canadian Dollars; 2. 1USD = 1.2CDN; 3. SCGT = Simple Cycle Gas Turbine; RR = Regulating Reserves; DIS = Distributed.

**Table S3.** Cost-effectiveness and GHG abatement of mitigation measures in the energy supply sector.

| No. | Mitigation Measure         | Cost-Effectiveness 2012 (\$/tCO <sub>2</sub> ) | GHG Abatement Assumptions      | References for Abatement Assumptions | GHG Abatement Assumptions in 2020 | GHG Abatement in 2020 (tCO <sub>2</sub> ) | GHG Abatement Assumptions in 2050 | GHG Abatement in 2050 (tCO <sub>2</sub> ) |
|-----|----------------------------|------------------------------------------------|--------------------------------|--------------------------------------|-----------------------------------|-------------------------------------------|-----------------------------------|-------------------------------------------|
| 1   | Biogas (Biofuel)           | 56.57                                          | 3% of Energy Supply in 2025    | [3]                                  | 298,242                           | 3% of Energy Supply in 2025               | [3]                               | 565,426                                   |
| 2   | Hydropower RR (Renewable)  | 69.65                                          | 14.5% of Energy Supply in 2025 | [3]                                  | 1,441,502                         | 14.5% of Energy Supply in 2025            | [3]                               | 2,732,892                                 |
| 3   | Hydropower DIS (Renewable) | 60.09                                          | 14.5% of Energy Supply in 2025 | [3]                                  | 1,441,502                         | 14.5% of Energy Supply in 2025            | [3]                               | 2,732,892                                 |
| 4   | Nuclear                    | 71.03                                          | 42% of Energy Supply in 2025   | [3]                                  | 4,175,384                         | 42% of Energy Supply in 2025              | [3]                               | 7,915,963                                 |
| 5   | Wind (Renewable)           | 190.58                                         | 11% of Energy Supply in 2025   | [3]                                  | 1,093,553                         | 11% of Energy Supply in 2025              | [3]                               | 2,073,228                                 |
| 6   | Solar (Renewable)          | 424.12                                         | 3% of Energy Supply in 2025    | [3]                                  | 298,242                           | 3% of Energy Supply in 2025               | [3]                               | 565,426                                   |

**Table S4.** Economic costs and GHG emission inputs of mitigation measures in the building sector.

| No. | Mitigation Measure                        | Reference Technology         | Sub-sector               | Economic Cost Inputs and Assumptions of Mitigation Measure                                                                                                                                                | References for Economic Costs | Economic Cost Inputs and Assumptions of Reference Technology | References for Economic Costs |
|-----|-------------------------------------------|------------------------------|--------------------------|-----------------------------------------------------------------------------------------------------------------------------------------------------------------------------------------------------------|-------------------------------|--------------------------------------------------------------|-------------------------------|
| 1   | Photovoltaics (Residential)               | None. Existing Energy Supply | Residential (Low-Rise)   | \$11 (2008)/W (Mean Capital Cost)<br>Power Capacity: 3.2 kW<br>Negligible incremental O&M Costs<br>Assumed building size: 190 m <sup>2</sup><br>Annual Energy Output/Savings: 4.2 MWh<br>30 year lifetime | [4,5]                         | N/A                                                          | N/A                           |
| 2   | Photovoltaics (Commercial-Small Business) | None. Existing Energy Supply | Commercial/Institutional | \$9.5 (2008)/W (Mean Capital Cost)<br>Power Capacity: 18 kW<br>Negligible incremental O&M Costs<br>Assumed building size: 930 m <sup>2</sup><br>Annual Energy Output/Savings: 23 MWh<br>30 year lifetime  | [4,5]                         | N/A                                                          | N/A                           |

Table S4. Cont.

| No. | Mitigation Measure                                 | Reference Technology         | Sub-sector               | Economic Cost Inputs and Assumptions of Mitigation Measure                                                                                                                                                                | References for Economic Costs | Economic Cost Inputs and Assumptions of Reference Technology                                                                                                                            | References for Economic Costs |
|-----|----------------------------------------------------|------------------------------|--------------------------|---------------------------------------------------------------------------------------------------------------------------------------------------------------------------------------------------------------------------|-------------------------------|-----------------------------------------------------------------------------------------------------------------------------------------------------------------------------------------|-------------------------------|
| 3   | Photovoltaics (Commercial/Institutional)           | None. Existing Energy Supply | Commercial/Institutional | \$9.5 (2008)/W (Mean Capital Cost)<br>Power Capacity: 120 kW<br>Negligible incremental O&M Costs<br>Assumed building size: 1500 m <sup>2</sup><br>Annual Energy Output/Savings: 150 MWh<br>30 year lifetime               | [4,5]                         | N/A                                                                                                                                                                                     | N/A                           |
| 4   | Solar Air Heater (Residential) NG Home             | Natural Gas Furnace          | Residential (Low-Rise)   | \$370 (2008)/m <sup>2</sup> (Mean Capital Cost)<br>Collector Area: 4 m <sup>2</sup><br>Negligible incremental O&M Costs<br>Assumed building size: 190 m <sup>2</sup><br>Offsets 80% of heating system<br>35 year lifetime | [4,6]                         | \$2750 (2015) (Capital and Installation Costs);<br>80% AFUE Standard Efficiency;<br>60,000 BTU Continuous Furnace Fan Motor<br>(720 h monthly in winter; 6 months);<br>18 year lifetime | [7–9]                         |
| 5   | Solar Air Heater (Residential) E Home              | Electric Heat Pump           | Residential (Low-Rise)   | \$370 (2008)/m <sup>2</sup> (Mean Capital Cost)<br>Collector Area: 4 m <sup>2</sup><br>Negligible incremental O&M Costs<br>Assumed building size: 190 m <sup>2</sup><br>Offsets 80% of heating system<br>35 year lifetime | [4,6]                         | \$4910 USD (2015) (Capital and Installation Costs); 10 kW Heat Pump<br>(160 h monthly in winter; 6 months);<br>15 year lifetime                                                         | [8–10]                        |
| 6   | Solar Air Heater (Commercial-Small Business) NG SB | Natural Gas Furnace          | Commercial               | \$370 (2008)/m <sup>2</sup> (Mean Capital Cost)<br>Collector Area: 40 m <sup>2</sup><br>Negligible incremental O&M Costs<br>Assumed building size: 930 m <sup>2</sup><br>35 year lifetime                                 | [4,6]                         | \$9000 (2015) (Capital and Installation Costs)<br>80% AFUE Standard<br>160,000 BTU<br>78% AFUE<br>18 year lifetime                                                                      | [7,8,11]                      |
| 7   | Solar Air Heater (Commercial-Small Business) E SB  | Electric Furnace             | Commercial               | \$370 (2008)/m <sup>2</sup> (Mean Capital Cost)<br>Collector Area: 4m <sup>2</sup><br>Negligible incremental O&M Costs<br>Assumed building size: 190 m <sup>2</sup><br>35 year lifetime                                   | [4,6]                         | \$10,510 USD (2015) (Capital per unit and Installation Costs)<br>5 × 20 kW Heat Pump<br>(160 h monthly in winter; 6 months)<br>15 year lifetime                                         | [8,10]                        |

Table S4. Cont.

| No. | Mitigation Measure                                                                                      | Reference Technology             | Sub-sector                | Economic Cost Inputs and Assumptions of Mitigation Measure                                                                                                                                                            | References for Economic Costs | Economic Cost Inputs and Assumptions of Reference Technology                                                                                                            | References for Economic Costs |
|-----|---------------------------------------------------------------------------------------------------------|----------------------------------|---------------------------|-----------------------------------------------------------------------------------------------------------------------------------------------------------------------------------------------------------------------|-------------------------------|-------------------------------------------------------------------------------------------------------------------------------------------------------------------------|-------------------------------|
| 8   | ENERGY STAR<br>Natural Gas<br>Furnace<br>NG Home                                                        | Standard Natural<br>Gas Furnace  | Residential (Low-Rise)    | \$8750 (2014) Capital Cost and Installation<br>60,000 BTU (98%AFUE)<br>Intermittent Furnace Fan Motor<br>(160 h monthly in winter; 6 months)                                                                          | [7,8]                         | \$7300 (2014) Capital Cost and<br>Installation<br>60,000 BTU (82% AFUE)<br>Intermittent Furnace Fan Motor<br>(160 h monthly in winter;<br>6 months)<br>18 year lifetime | [7,8]                         |
| 9   | Electric Heat<br>Pump<br>NG Home                                                                        | Standard Natural<br>Gas Furnace  | Residential (Low-Rise)    | \$4910 USD (2015) (Capital and<br>Installation Costs)<br>10 kW Heat Pump (160 h monthly<br>in winter; 6 months)<br>15 year lifetime                                                                                   | [8–10]                        | \$7300 (2014) Capital Cost and<br>Installation<br>60,000BTU (82% AFUE)<br>Intermittent Furnace Fan Motor<br>(160 h monthly in winter;<br>6 months)<br>18 year lifetime  | [7,8]                         |
| 10  | Solar Water<br>Heater (Replacing<br>Electric Storage<br>Water Heater)<br>(Residential)<br>E Home        | Electric Storage<br>Water Heater | Residential<br>(Low-Rise) | \$1000 (2008)/m <sup>2</sup> (Mean Capital Cost)<br>Collector Area: 6 m <sup>2</sup><br>Negligible incremental O&M Costs<br>Assumed building size: 190 m <sup>2</sup><br>80% solar usage annually<br>25 year lifetime | [4,12,13]                     | \$950 USD(2005) (Average<br>Capital & Installation)<br>5 kW (40 Gal capacity)<br>118h of use monthly<br>10 year lifetime                                                | [9,14]                        |
| 11  | Solar Water<br>Heater (Replacing<br>Natural Gas<br>Storage Water<br>Heater)<br>(Residential)<br>NG Home | Gas Storage Water<br>Heater      | Residential<br>(Low-Rise) | \$1000 (2008)/m <sup>2</sup> (Mean Capital Cost)<br>Collector Area: 6 m <sup>2</sup><br>Negligible incremental O&M Costs<br>Assumed building size: 190 m <sup>2</sup><br>80% solar usage annually<br>25 year lifetime | [4,12,13]                     | \$1137.50 USD (2005) (Average<br>Capital & Installation)<br>40,000 BTU hourly<br>(40 Gal capacity)<br>0.75 Efficiency Factor<br>118h of use monthly<br>10 year lifetime | [9,14]                        |

Table S4. Cont.

| No. | Mitigation Measure                                                                                 | Reference Technology          | Sub-sector               | Economic Cost Inputs and Assumptions of Mitigation Measure                                                                                                                                  | References for Economic Costs | Economic Cost Inputs and Assumptions of Reference Technology                                                                    | References for Economic Costs |
|-----|----------------------------------------------------------------------------------------------------|-------------------------------|--------------------------|---------------------------------------------------------------------------------------------------------------------------------------------------------------------------------------------|-------------------------------|---------------------------------------------------------------------------------------------------------------------------------|-------------------------------|
| 12  | Solar Water Heater (Replacing Electric Storage Water Heater) (Commercial-Small Business) E SB      | Electric Storage Water Heater | Commercial/Institutional | \$1000 (2008)/m <sup>2</sup> (Mean Capital Cost)<br>Collector Area: 8 m <sup>2</sup><br>Negligible incremental O&M Costs<br>Assumed building size: 930 m <sup>2</sup><br>25 year lifetime   | [4,13]                        | \$2004 USD (2015)<br>6kW (80 Gal capacity)<br>10 year lifetime                                                                  | [14–16]                       |
| 13  | Solar Water Heater (Replacing Natural Gas Storage Water Heater) (Commercial - Small Business) E SB | Gas Storage Water Heater      | Commercial/Institutional | \$1000 (2008)/m <sup>2</sup> (Mean Capital Cost)<br>Collector Area: 8 m <sup>2</sup><br>Negligible incremental O&M Costs<br>Assumed building size: 930 m <sup>2</sup><br>25 year lifetime   | [4,13]                        | \$2394 USD (2015)<br>75,000 BTU hourly (75 Gal capacity)<br>0.8 Efficiency Factor<br>Usage 12h/day assumed<br>10 year lifetime  | [14,17]                       |
| 14  | Solar Water Heater (Replacing Electric Storage Water Heater) (Commercial/Institutional) E C/I      | Electric Storage Water Heater | Commercial/Institutional | \$1000 (2008)/m <sup>2</sup> (Mean Capital Cost)<br>Collector Area: 46 m <sup>2</sup><br>Negligible incremental O&M Costs<br>Assumed building size: 1500 m <sup>2</sup><br>25 year lifetime | [4,13]                        | \$6076 USD(2015)<br>45 kW (120 Gal capacity)<br>10 year lifetime                                                                | [14,15,16]                    |
| 15  | Solar Water Heater (Replacing Natural Gas Storage Water Heater) (Commercial/Institutional) NG C/I  | Gas Storage Water Heater      | Commercial/Institutional | \$1000 (2008)/m <sup>2</sup> (Mean Capital Cost)<br>Collector Area: 46 m <sup>2</sup><br>Negligible incremental O&M Costs<br>Assumed building size: 1500 m <sup>2</sup><br>25 year lifetime | [4,13]                        | \$7,942USD(2015)<br>250,000 BTU hourly (120 Gal capacity)<br>0.8 Efficiency Factor<br>Usage 12h/day assumed<br>10 year lifetime | [14,15,18]                    |

Table S4. Cont.

| No. | Mitigation Measure                                               | Reference Technology                | Sub-sector               | Economic Cost Inputs and Assumptions of Mitigation Measure                                                                                                                                                          | References for Economic Costs | Economic Cost Inputs and Assumptions of Reference Technology                                                            | References for Economic Costs |
|-----|------------------------------------------------------------------|-------------------------------------|--------------------------|---------------------------------------------------------------------------------------------------------------------------------------------------------------------------------------------------------------------|-------------------------------|-------------------------------------------------------------------------------------------------------------------------|-------------------------------|
| 16  | Wind (Residential)                                               | None. Existing Energy Supply        | Residential (Low-Rise)   | \$6.8 (2008)/W (Mean Capital Cost)<br>Power Capacity: 2.6 kW<br>\$335 (2008)/building (Annual O&M Costs)<br>Assumed building size: 190 m <sup>2</sup><br>Annual Energy Output/Savings: 4.9 MWh<br>25 year lifetime  | [4,19]                        | None.                                                                                                                   | -                             |
| 17  | Wind (Commercial-Small Business)                                 | None. Existing Energy Supply        | Commercial/Institutional | \$6.2 (2008)/W (Mean Capital Cost)<br>Power Capacity: 10kW<br>\$1237 (2008)/building (Annual O&M Costs)<br>Assumed building size: 930 m <sup>2</sup><br>Annual Energy Output/Savings: 12 MWh<br>25 year lifetime    | [4,19]                        | None.                                                                                                                   | -                             |
| 18  | Wind (Commercial/Institutional)                                  | None. Existing Energy Supply        | Commercial/Institutional | \$3.6 (2008)/W (Mean Capital Cost)<br>Power Capacity: 50 kW<br>\$3550 (2008)/building (Annual O&M Costs)<br>Assumed building size: 1500 m <sup>2</sup><br>Annual Energy Output/Savings: 130 MWh<br>25 year lifetime | [4,19]                        | None.                                                                                                                   | -                             |
| 19  | ENERGY STAR High Efficiency Electric Storage Water Heater E Home | Standard Electric Water Tank Heater | Residential (Low-Rise)   | \$1640 USD (2015) (Average Capital & Installation)<br>4.5 kW (40 Gal capacity)<br>118 h of use monthly<br>10 year lifetime                                                                                          | [9,14,16]                     | \$950 USD( 2005) (Average Capital & Installation)<br>5 kW (40 Gal capacity)<br>118 h of use monthly<br>10 year lifetime | [9,14]                        |

Table S4. Cont.

| No. | Mitigation Measure                                                            | Reference Technology                | Sub-sector             | Economic Cost Inputs and Assumptions of Mitigation Measure                                                             | References for Economic Costs | Economic Cost Inputs and Assumptions of Reference Technology                                                                                                          | References for Economic Costs |
|-----|-------------------------------------------------------------------------------|-------------------------------------|------------------------|------------------------------------------------------------------------------------------------------------------------|-------------------------------|-----------------------------------------------------------------------------------------------------------------------------------------------------------------------|-------------------------------|
| 20  | ENERGY STAR High Efficiency Electric Storage Water Heater (Heat Pump) E Home  | Standard Electric Water Tank Heater | Residential (Low-Rise) | \$4528 USD (2014)<br>(Average Capital & Installation)<br>2195 kWh/year<br>20 year lifetime                             | [14,20]                       | \$950 USD (2005) (Average Capital & Installation)<br>5kW (40 Gal capacity)<br>118 h of use monthly<br>10 year lifetime                                                | [9,14,21]                     |
| 21  | ENERGY STAR Whole Home Gas Tankless Water Heater NG Home                      | Standard Gas Storage Water Heater   | Residential (Low-Rise) | \$1420 USD (2015)<br>(Average Capital & Installation)<br>30% less than standard gas storage models<br>20 year lifetime | [14,20,22]                    | \$1137.50 USD(2005)<br>(Average Capital & Installation)<br>40,000 BTU hourly (40 Gal capacity)<br>0.75 Efficiency Factor<br>118 h of use monthly<br>10 year lifetime  | [9,14]                        |
| 22  | ENERGY STAR High-Efficiency Gas Storage Water Heater NG Home                  | Standard Gas Storage Water Heater   | Residential (Low-Rise) | \$2044USD (2015)<br>(Average Capital & Installation)<br>14% less than standard gas storage models<br>10 year lifetime  | [14,17,20]                    | \$1137.50 USD (2005)<br>(Average Capital & Installation)<br>40,000 BTU hourly (40 Gal capacity)<br>0.75 Efficiency Factor<br>118h of use monthly<br>10 year lifetime  | [9,14]                        |
| 23  | ENERGY STAR High Efficiency Electric Storage Water Heater (Heat Pump) NG Home | Standard Gas Storage Water Heater   | Residential (Low-Rise) | \$4528 USD (2014)<br>(Average Capital & Installation)<br>2195 kWh/year<br>20 year lifetime                             | [14,20]                       | \$1137.50 USD (2005)<br>(Average Capital & Installation)<br>40,000 BTU hourly (40 Gal capacity)<br>0.75 Efficiency Factor<br>118 h of use monthly<br>10 year lifetime | [9,14]                        |

Table S4. Cont.

| No. | Mitigation Measure                          | Reference Technology                     | Sub-sector               | Economic Cost Inputs and Assumptions of Mitigation Measure                                                                                                                                                               | References for Economic Costs | Economic Cost Inputs and Assumptions of Reference Technology | References for Economic Costs |
|-----|---------------------------------------------|------------------------------------------|--------------------------|--------------------------------------------------------------------------------------------------------------------------------------------------------------------------------------------------------------------------|-------------------------------|--------------------------------------------------------------|-------------------------------|
| 24  | ENERGY STAR Refrigerator                    | Standard Refrigerator                    | Residential (LR and MUR) | \$765 (2015)<br>382 kWh annual<br>11 year lifetime                                                                                                                                                                       | [23–25]                       | \$729 (2014)<br>664kWh annual<br>11 year lifetime            | [23–25]                       |
| 25  | ENERGY STAR Clothes Dryer (Electric) E Home | Standard Electric Clothes Dryer Electric | Residential (LR and MUR) | \$1500 (2011)<br>684 kWh annual<br>14 year lifetime                                                                                                                                                                      | [26]                          | \$1015 USD (2013)<br>967 kWh annual<br>14 year lifetime      | [26,27]                       |
| 26  | ENERGY STAR Clothes Dryer (Gas) NG Home     | Standard Gas Clothes Dryer               | Residential (Low-Rise)   | \$1500 (2011)<br>748 kWh annual<br>14 year lifetime                                                                                                                                                                      | [26]                          | \$1150 USD (2013)<br>1091 kWh annual<br>14 year lifetime     | [26,27]                       |
| 27  | ENERGY STAR Dishwasher                      | Standard Dishwasher                      | Residential (LR and MUR) | \$1,274 (2015)<br>322 kWh annual<br>9 year lifetime                                                                                                                                                                      | [23–25]                       | \$949 (2014)<br>649 kWh annual<br>9 year lifetime            | [23–25]                       |
| 28  | ENERGY STAR Clothes Washer                  | Standard Clothes Washer                  | Residential (LR and MUR) | \$799 (2015)<br>251 kWh annual<br>14 year lifetime                                                                                                                                                                       | [24]                          | \$699 (2014)<br>930 kWh annual<br>14 year lifetime           | [24]                          |
| 29  | ENERGY STAR Light Bulbs (LED)               | Incandescent                             | Residential (Low-Rise)   | \$9.99USD(2015)<br>9 W; 50,000 h<br>Usage assumed 3 h/day                                                                                                                                                                | [28–31]                       | \$1.50 USD (2015)<br>40W; 1,200 h<br>Usage assumed 3 h/day   | [28–31]                       |
| 30  | ENERGY STAR Light Bulbs (CFL)               | Incandescent                             | Residential (Low-Rise)   | \$5.93USD(2015)<br>26 W; 8000 h<br>Usage assumed 3 h/day<br>Toronto values from CHMC: Cooling reduced by 19% (average of 15%-22%)<br>Heating increased by 0.6%–1.7%, considered negligible<br>Cost saving reduced by 40% | [28,30–32]                    | \$1.50 USD (2015)<br>40 W; 1200 h<br>Usage assumed 3 h/day   | [28,30,31]                    |
| 31  | ENERGY STAR Light Bulbs (LED)               | Incandescent                             | Residential (MUR)        | \$11.98 (2015)<br>12 W; 50,000 h<br>Usage assumed 3 h/day                                                                                                                                                                | [28,29,31]                    | \$2.16 USD( 2015)<br>65 W; 1,200 h<br>Usage assumed 3 h/day  | [28,29,31]                    |

Table S4. Cont.

| No. | Mitigation Measure            | Reference Technology           | Sub-sector               | Economic Cost Inputs and Assumptions of Mitigation Measure                                                                                                                                                                           | References for Economic Costs | Economic Cost Inputs and Assumptions of Reference Technology | References for Economic Costs |
|-----|-------------------------------|--------------------------------|--------------------------|--------------------------------------------------------------------------------------------------------------------------------------------------------------------------------------------------------------------------------------|-------------------------------|--------------------------------------------------------------|-------------------------------|
| 32  | ENERGY STAR Light Bulbs (CFL) | Incandescent                   | Residential (MUR)        | \$5.93 USD (2015)<br>26 W; 8000 h<br>Usage assumed 3 h/day<br>Toronto values from CHMC:<br>Cooling reduced by 63 kWh/year<br>Heating increased by 0.6–1.7%,<br>considered negligible<br>Cost saving reduced by 40%                   | [28,30–32]                    | \$2.16 USD (2015)<br>65 W; 1,200 h<br>Usage assumed 3h/day   | [28,30,31]                    |
| 33  | ENERGY STAR Light Bulbs (LED) | Incandescent                   | Commercial/Institutional | \$51.95 USD (2015)<br>23 W; 50,000 h<br>Usage assumed 8 h/day                                                                                                                                                                        | [28,30–32]                    | \$2.30 USD (2015)<br>100 W; 1,200 h<br>Usage assumed 8 h/day | [28,30,33]                    |
| 34  | ENERGY STAR Light Bulbs (CFL) | Incandescent                   | Commercial/Institutional | \$5.93 USD (2015)<br>26 W; 8,000 h<br>Usage assumed 8 h/day<br>Toronto values from CHMC:<br>Cooling reduced by 19%<br>(average of 15%–22%)<br>Heating increased by 0.6%–1.7%,<br>considered negligible<br>Cost saving reduced by 40% | [28,30–32]                    | \$2.30 USD (2015)<br>100 W; 1,200 h<br>Usage assumed 8 h/day | [28,30,33]                    |
| 35  | ENERGYSTAR Air Conditioning   | Standard Air Conditioning Unit | Residential (Low-Rise)   | \$1245 USD (2015)<br>2315 kWh/year<br>15 year lifetime                                                                                                                                                                               | [24,34]                       | \$850USD(2015)<br>2,850kWh/year<br>15 year lifetime          | [24,34]                       |
| 36  | ENERGYSTAR HVAC               | Standard HVAC Unit             | Commercial/Institutional | \$9617 USD (2015)<br>10,805 kWh/year<br>15 year lifetime                                                                                                                                                                             | [24,35]                       | \$10,257 USD (2015)<br>12,519 kWh/year<br>15 year lifetime   | [24,35]                       |

1. Incremental O&M costs for Photovoltaics and Wind technologies were used without calculation of the mitigation *vs.* reference because the figures were from a Toronto Case study so the approximation is valid; 2. If the difference between the lifetime of the Reference technology and mitigation measure is 5 years, it was taken to be equivalent in the calculations; 3. If not stated otherwise, costs are in Canadian Dollars; 4. 1 USD = 1.2 CDN.

**Table S5.** Cost-effectiveness and GHG abatement of mitigation measures in the building sector.

| No. | Mitigation Measure                                                                | Cost-Effectiveness 2012 (\$/tCO <sub>2</sub> ) | GHG Abatement Assumptions                                                | References for Abatement Assumptions | GHG Abatement Assumptions in 2020 | GHG Abatement in 2020 (tCO <sub>2</sub> ) | GHG Abatement Assumptions in 2050 | GHG Abatement in 2050 (tCO <sub>2</sub> ) |
|-----|-----------------------------------------------------------------------------------|------------------------------------------------|--------------------------------------------------------------------------|--------------------------------------|-----------------------------------|-------------------------------------------|-----------------------------------|-------------------------------------------|
| 1   | Photovoltaics (Residential)                                                       | 2384                                           | 100 systems installed 2008–2010; 50 systems annually                     | [36]                                 | 400 system implementations        | 6048                                      | 1900 system implementations       | 28,728                                    |
| 2   | Photovoltaics (Commercial-Small Business)                                         | 1989                                           | Estimated based on residential application; assuming 10 systems annually | [36]                                 | 80 system implementations         | 6624                                      | 380 system implementations        | 31,464                                    |
| 3   | Photovoltaics (Commercial/Institutional)                                          | 2045                                           | Estimated based on residential application; assuming 5 systems annually  | [36]                                 | 40 system implementations         | 21,600                                    | 190 system implementations        | 102,600                                   |
| 4   | Solar Air Heater (Residential) NG Home                                            | −161                                           | Estimated based on residential application; assuming 50 systems annually | [36]                                 | 400 system implementations        | 47,734                                    | 1900 system implementations       | 226,739                                   |
| 5   | Solar Air Heater (Residential) E Home                                             | −351                                           | Estimated based on residential application; assuming 50 systems annually | [36]                                 | 400 system implementations        | 12,902                                    | 1,900 system implementations      | 61,286                                    |
| 6   | Solar Air Heater (Commercial-Small Business) NG SB                                | −23                                            | Estimated based on residential application; assuming 10 systems annually | [36]                                 | 80 system implementations         | 26,111                                    | 380 system implementations        | 124,028                                   |
| 7   | Solar Air Heater (Commercial-Small Business) E SB                                 | −448                                           | Estimated based on residential application; assuming 10 systems annually | [36]                                 | 80 system implementations         | 25,805                                    | 380 system implementations        | 122,573                                   |
| 8   | ENERGY STAR Natural Gas Furnace NG Home                                           | −18                                            | 50 households went through the HEAT Program annually                     | [37]                                 | 400 households                    | 4888                                      | 1900 households                   | 23,217                                    |
| 9   | Electric Heat Pump NG Home                                                        | −220                                           | 50 households went through the HEAT Program annually                     | [37]                                 | 400 households                    | 31,860                                    | 1900 households                   | 151,336                                   |
| 10  | Solar Water Heater (Replacing Electric Storage Water Heater) (Residential) E Home | −158                                           | 100 systems installed 2008–2010; 50 systems annually                     | [36]                                 | 400 system implementations        | 6797                                      | 1900 system implementations       | 32,285                                    |

Table S5. Cont.

| No. | Mitigation Measure                                                                                              | Cost-Effectiveness<br>2012 (\$/tCO <sub>2</sub> ) | GHG Abatement Assumptions                                                           | References for<br>Abatement<br>Assumptions | GHG Abatement<br>Assumptions in<br>2020 | GHG<br>Abatement in<br>2020 (tCO <sub>2</sub> ) | GHG Abatement<br>Assumptions in<br>2050 | GHG<br>Abatement in<br>2050 (tCO <sub>2</sub> ) |
|-----|-----------------------------------------------------------------------------------------------------------------|---------------------------------------------------|-------------------------------------------------------------------------------------|--------------------------------------------|-----------------------------------------|-------------------------------------------------|-----------------------------------------|-------------------------------------------------|
| 11  | Solar Water Heater<br>(Replacing Natural Gas<br>Storage Water Heater)<br>(Residential)<br>NG Home               | -58                                               | 100 systems installed 2008-2010;<br>50 systems annually                             | [36]                                       | 400 system<br>implementations           | 38,304                                          | 1900 system<br>implementations          | 181,946                                         |
| 12  | Solar Water Heater<br>(Replacing Electric<br>Storage Water Heater)<br>(Commercial-Small<br>Business)<br>E SB    | -452                                              | Estimated based on residential<br>application;<br>assuming 10 systems annually      | [36]                                       | 80 system<br>implementations            | 5406                                            | 80 system<br>implementations            | 23,967                                          |
| 13  | Solar Water Heater<br>(Replacing Natural Gas<br>Storage Water Heater)<br>(Commercial-Small<br>Business)<br>E SB | -57                                               | Estimated based on residential<br>application;<br>assuming 10 systems annually      | [36]                                       | 80 system<br>implementations            | 31,102                                          | 80 system<br>implementations            | 147,735                                         |
| 14  | Solar Water Heater<br>(Replacing Electric<br>Storage Water Heater)<br>(Commercial/Institutional)<br>E C/I       | -560                                              | Estimated based on residential<br>application;<br>assuming 5 systems annually       | [36]                                       | 40 system<br>implementations            | 18,922                                          | 40 system<br>implementations            | 89,878                                          |
| 15  | Solar Water Heater<br>(Replacing Natural Gas<br>Storage Water Heater)<br>(Commercial/Institutional)<br>NG C/I   | -63                                               | Estimated based on residential<br>application;<br>assuming 5 systems annually       | [36]                                       | 40 system<br>implementations            | 64,796                                          | 40 system<br>implementations            | 307,780                                         |
| 16  | Wind (Residential)                                                                                              | 1058                                              | Estimated based on 10 installations<br>in Toronto<br>2002–2011; assuming 1 annually | [38]                                       | 8 installations                         | 118                                             | 38 installations                        | 559                                             |

Table S5. Cont.

| No. | Mitigation Measure                                                           | Cost-Effectiveness 2012 (\$/tCO <sub>2</sub> ) | GHG Abatement Assumptions                                                                                                                       | References for Abatement Assumptions | GHG Abatement Assumptions in 2020 | GHG Abatement in 2020 (tCO <sub>2</sub> ) | GHG Abatement Assumptions in 2050 | GHG Abatement in 2050 (tCO <sub>2</sub> ) |
|-----|------------------------------------------------------------------------------|------------------------------------------------|-------------------------------------------------------------------------------------------------------------------------------------------------|--------------------------------------|-----------------------------------|-------------------------------------------|-----------------------------------|-------------------------------------------|
| 17  | Wind (Commercial - Small Business)                                           | 1805                                           | Estimated based on 10 installations in Toronto 2002–2011; assuming 1 annually                                                                   | [38]                                 | 8 installations                   | 288                                       | 38 installations                  | 1368                                      |
| 18  | Wind (Commercial/ Institutional)                                             | 124                                            | 10 installations in Toronto 2002–2011; assuming 1 annually                                                                                      | [38]                                 | 8 installations                   | 3120                                      | 38 installations                  | 14,820                                    |
| 19  | ENERGY STAR High Efficiency Electric Storage Water Heater E Home             | −559                                           | Electric water heaters are 40% of the market share (97% storage tanks; 3% tankless)<br>Assumed 3% market penetration of ENERGY STAR products    | [38]                                 | Calculated from assumptions       | 4108                                      | Calculated from assumptions       | 5154                                      |
| 20  | ENERGY STAR High Efficiency Electric Storage Water Heater (Heat Pump) E Home | −396                                           | Electric water heaters are 40% of the market share (97% storage tanks; 3% tankless)<br>1% market penetration in 2011 of ENERGY STAR products    | [20,39]                              | Calculated from assumptions       | 584                                       | Calculated from assumptions       | 733                                       |
| 21  | ENERGY STAR Whole Home Gas Tankless Water Heater NG Home                     | −181                                           | Gas water heaters are 53% of the market share (97% storage tanks; 3% tankless)<br>Assumed 1% market penetration in 2011 of ENERGY STAR products | [20]                                 | Calculated from assumptions       | 1897                                      | Calculated from assumptions       | 2380                                      |
| 22  | ENERGY STAR High-Efficiency Gas Storage Water Heater NG Home                 | −73                                            | Gas water heaters are 53% of the market share (97% storage tanks; 3% tankless)<br>3% market penetration of ENERGY STAR products                 | [20,39]                              | Calculated from assumptions       | 42,943                                    | Calculated from assumptions       | 53,875                                    |
| 23  | ENERGY STAR High Efficiency Electric Water Heater (Heat Pump) NG Home        | −63                                            | Electric water heaters are 40% of the market share (97% storage tanks; 3% tankless)<br>1% market penetration in 2011 of ENERGY STAR products    | [20,39]                              | Calculated from assumptions       | 4511                                      | Calculated from assumptions       | 5659                                      |
| 24  | ENERGY STAR Refrigerator                                                     | −658                                           | 56% market penetration in 2011 of ENERGY STAR products                                                                                          | [39]                                 | Calculated from assumptions       | 232,225                                   | Calculated from assumptions       | 291,343                                   |

Table S5. Cont.

| No. | Mitigation Measure                          | Cost-Effectiveness 2012 (\$/tCO <sub>2</sub> ) | GHG Abatement Assumptions                                                                                              | References for Abatement Assumptions | GHG Abatement Assumptions in 2020                                                                                             | GHG Abatement in 2020 (tCO <sub>2</sub> ) | GHG Abatement Assumptions in 2050                                                                                             | GHG Abatement in 2050 (tCO <sub>2</sub> ) |
|-----|---------------------------------------------|------------------------------------------------|------------------------------------------------------------------------------------------------------------------------|--------------------------------------|-------------------------------------------------------------------------------------------------------------------------------|-------------------------------------------|-------------------------------------------------------------------------------------------------------------------------------|-------------------------------------------|
| 25  | ENERGY STAR Clothes Dryer (Electric) E Home | 257                                            | 63% of households have an electric clothes dryer<br>Assumed 61% market penetration                                     | [40]                                 | Calculated from assumptions                                                                                                   | 203,547                                   | Calculated from assumptions                                                                                                   | 255,364                                   |
| 26  | ENERGY STAR Clothes Dryer (Gas) NG Home     | 186                                            | 15% of households have a gas clothes dryer<br>Assumed 61% market penetration                                           | [40]                                 | Calculated from assumptions                                                                                                   | 98,857                                    | Calculated from assumptions                                                                                                   | 124,023                                   |
| 27  | ENERGY STAR Dishwasher                      | -9                                             | Assumed 60% of households have a dishwasher<br>96% market penetration in 2011 of ENERGY STAR products                  | [39]                                 | Calculated from assumptions                                                                                                   | 226,617                                   | Calculated from assumptions                                                                                                   | 284,307                                   |
| 28  | ENERGY STAR Clothes Washer                  | -566                                           | Assumed 80% have a clothes washer<br>61% market penetration in 2011 of ENERGY STAR products                            | [39]                                 | Calculated from assumptions                                                                                                   | 620,151                                   | Calculated from assumptions                                                                                                   | 778,728                                   |
| 29  | ENERGY STAR Light Bulbs (LED)               | -433                                           | 70% of residential lighting is currently incandescent<br>Market penetration of LED is 20%<br>Assume 30 bulbs/household | [39,41]                              | Based on existing stock in 2012,<br>57,545 incandescent lightbulbs replaced annually for 8 years<br>460,360 LED lightbulbs    | 85,627                                    | Based on existing stock in 2012,<br>57,545 incandescent lightbulbs replaced annually for 38 years<br>2,186,710 LED lightbulbs | 406,728                                   |
| 30  | ENERGY STAR Light Bulbs (CFL)               | -607                                           | 70% of residential lighting is currently incandescent<br>Market penetration of CFL is 76%<br>Assume 30 bulbs/household | [39,41]                              | Based on existing stock in 2012,<br>218,671 incandescent lightbulbs replaced annually for 8 years<br>1,749,368 CFL lightbulbs | 27,979                                    | Based on existing stock in 2012,<br>218,671 incandescent lightbulbs replaced annually for 38 years<br>8,309,49 CFL lightbulbs | 132,899                                   |
| 31  | ENERGY STAR Light Bulbs (LED)               | -433                                           | 70% of residential lighting is currently incandescent<br>Market penetration of LED is 20%                              | [39,41]                              | 24,634 lightbulbs replaced to LED (representing 20% of the market share)<br>197,072 lightbulbs                                | 62,669                                    | 24,634 lightbulbs replaced to LED (representing 20% of the market share)<br>936,092 lightbulbs                                | 297,677                                   |

Table S5. Cont.

| No. | Mitigation Measure            | Cost-Effectiveness 2012 (\$/tCO <sub>2</sub> ) | GHG Abatement Assumptions                                                                                                                                                                                                                   | References for Abatement Assumptions | GHG Abatement Assumptions in 2020                                                                                                                                    | GHG Abatement in 2020 (tCO <sub>2</sub> ) | GHG Abatement Assumptions in 2050                                                                                                                                      | GHG Abatement in 2050 (tCO <sub>2</sub> ) |
|-----|-------------------------------|------------------------------------------------|---------------------------------------------------------------------------------------------------------------------------------------------------------------------------------------------------------------------------------------------|--------------------------------------|----------------------------------------------------------------------------------------------------------------------------------------------------------------------|-------------------------------------------|------------------------------------------------------------------------------------------------------------------------------------------------------------------------|-------------------------------------------|
| 32  | ENERGY STAR Light Bulbs (CFL) | -582                                           | TCHC Case study shows 18,722 CFL lightbulbs replacing incandescent lightbulbs in 15 MUR in 2011; and 74 MURs in 2012. 70% of residential lighting is currently incandescent. Market penetration of CFL is 76%                               | [39,41,42]                           | Assumed 93,610 incandescent lightbulbs replaced with CFL annually for 8 years; 93,610 light bulbs annually (representing 76% of the market share) 748,880 lightbulbs | 33,365                                    | Assumed 93,610 incandescent lightbulbs replaced with CFL annually for 8 years; 93,610 light bulbs annually (representing 76% of the market share) 3,557,180 lightbulbs | 158,485                                   |
| 33  | ENERGY STAR Light Bulbs (LED) | -527                                           | 0.4 lightbulbs/m <sup>2</sup> assumed. 10% of commercial lighting is currently incandescent. Market penetration of LED is 20%. Assuming 208 lightbulbs replaced in a 502 sq m commercial establishment based on a Toronto Hydro case study. | [39,41]                              | Calculated from assumptions                                                                                                                                          | 428,316                                   | Calculated from assumptions                                                                                                                                            | 847,292                                   |
| 34  | ENERGY STAR Light Bulbs (CFL) | -460                                           | Assuming 0.4 lightbulbs/m <sup>2</sup> . 10% of commercial lighting is currently incandescent. Market penetration of CFL is 76%                                                                                                             | [39,41,43,44]                        | Calculated from assumptions                                                                                                                                          | 306,080                                   | Calculated from assumptions                                                                                                                                            | 605,485                                   |
| 35  | ENERGY STAR Air Conditioning  | -134                                           | 50 households went through the HEAT Program annually; assuming a similar number for cooling initiatives                                                                                                                                     | [37]                                 | 400 households                                                                                                                                                       | 385                                       | 1,900 households                                                                                                                                                       | 1,830                                     |
| 36  | ENERGY STAR HVAC              | -387                                           | 50 households went through the HEAT Program annually; assuming a similar number for cooling initiatives                                                                                                                                     |                                      | 400 establishments                                                                                                                                                   | 1234                                      | 1,900 establishments                                                                                                                                                   | 5,862                                     |

**Table S6.** Economic costs and GHG emission inputs of mitigation measures in the transportation sector.

| No. | Mitigation Measure              | Reference Technology                    | Sub-Sector        | Economic Cost Inputs and Assumptions of Mitigation Measure                                                                                                                                                                                       | References for Economic Costs | Economic Cost Inputs and Assumptions of Reference Technology                                                                                                                    | References for Economic Costs |
|-----|---------------------------------|-----------------------------------------|-------------------|--------------------------------------------------------------------------------------------------------------------------------------------------------------------------------------------------------------------------------------------------|-------------------------------|---------------------------------------------------------------------------------------------------------------------------------------------------------------------------------|-------------------------------|
| 1   | Battery Electric Vehicle        | Vehicle with Internal Combustion Engine | Passenger vehicle | \$40,000 (2012) (Average vehicle)<br>\$217.50 (2012) O&M costs are assumed one third cheaper than ICT.<br>23 kWh battery (4–6 h charging)<br>Electric range 122 km<br>Annual distance travelled 15,000 km<br>15 year lifetime<br>\$40,000 (2012) | [2,45]                        | \$25,000 (2015) (Average vehicle)<br>\$652.50 (2012) (CAA 2012) (Average vehicle price)<br>9.5l/100km (2010 stock average for LDV)<br>2.8kg/l CO <sub>2</sub> intensity of fuel | [2,46,47]                     |
| 2   | Plug-in Hybrid Electric Vehicle | Vehicle with Internal Combustion Engine | Passenger vehicle | (Price of average vehicle)<br>\$0.27 kWh/km (average) Fuel consumption<br>Annual distance travelled 15,000 km<br>Assuming 60% on electricity and 40% on gas<br>15 year lifetime<br>\$734,000 (2008)                                              | [2,45]                        | \$25,000 (2015) (Average vehicle price)<br>9.5l/100 km (2010 stock average for LDV)<br>2.8kg/LCO <sub>2</sub> intensity of fuel                                                 | [2,47]                        |
| 3   | Diesel/Hybrid Bus               | Diesel Bus                              | Bus               | 27/100 km<br>Annual distance travelled 73,000 km<br>18 year lifetime<br>\$43,120 (USD2015)                                                                                                                                                       | [2,47]                        | \$500,000 (2008)<br>39l/100 km<br>Annual distance travelled 73,000 km                                                                                                           | [2,47]                        |
| 4   | Medium Duty Truck               | Medium Duty Truck                       | Freight Truck     | 16l/100 km<br>Assumed 146,000 km travelled per year<br>4 year lifetime<br>\$84,600 (USD2015)                                                                                                                                                     | [2,49,50]                     | \$38,120 (Assumed \$5,000 (USD2014) less than new truck)<br>20l/100 km                                                                                                          | [2]                           |
| 5   | Heavy Duty Truck                | Heavy Duty Truck                        | Freight Truck     | 28.5l/100 km<br>Assumed 160,000 km travelled per year<br>4 year lifetime                                                                                                                                                                         | [2,49,50]                     | \$74,600 (Assumed \$10,000 (USD2014) less than new truck)<br>36l/100 km                                                                                                         | [2]                           |

1. If not stated otherwise, costs are in Canadian Dollars; 2. 1USD = 1.2CDN.

**Table S7.** Cost-effectiveness and GHG abatement of mitigation measures in the transportation sector.

| No. | Mitigation Measure              | Cost-Effectiveness 2012 (\$/tCO <sub>2</sub> ) | GHG Abatement Assumptions                                                                                                                                    | References for Abatement Assumptions | GHG Abatement Assumptions in 2020 | GHG Abatement in 2020 (tCO <sub>2</sub> e) | GHG Abatement Assumptions in 2050 | GHG Abatement in 2050 (tCO <sub>2</sub> ) |
|-----|---------------------------------|------------------------------------------------|--------------------------------------------------------------------------------------------------------------------------------------------------------------|--------------------------------------|-----------------------------------|--------------------------------------------|-----------------------------------|-------------------------------------------|
| 1   | Battery Electric Vehicle        | 111                                            | 119BEVs/year based on Plug “n” Drive Statistics 2011–2014                                                                                                    | [45]                                 | 1248 vehicles                     | 59,632                                     | 5928 vehicles                     | 283,254                                   |
| 2   | Plug-in Hybrid Electric Vehicle | 283                                            | 98PHEVs/year based on Plug “n” Drive Statistics 2011–2014                                                                                                    | [45]                                 | 488 vehicles                      | 28,943                                     | 2318 vehicles                     | 137,477                                   |
| 3   | Diesel/Hybrid Bus               | 360                                            | Based on 33% of 500 bus fleet is diesel/hybrid, and assumed in the time frame 2008-2015. 24 buses/year                                                       | [51]                                 | 192 buses                         | 83,540                                     | 912 buses                         | 396,813                                   |
| 4   | Medium Duty Truck               | -354                                           | Assuming rate of greening is similar to City’s green fleet plan of 130 vehicles/year total.<br>Ratio of Medium:Heavy is 70:30 assumed<br>Assumed 39 per year | [52,53]                              | 312 trucks                        | 20,111                                     | 1482 trucks                       | 95,529                                    |
| 5   | Heavy Duty Truck                | -354                                           | Assuming rate of greening is similar to City’s green fleet plan of 130 vehicles/year total.<br>Ratio of Medium:Heavy is 70:30 assumed<br>Assumed 91 per year | [52,53]                              | 728 trucks                        | 96,424                                     | 3458 trucks                       | 458,016                                   |

**Table S8.** Economic costs and GHG emission inputs of mitigation measures in the waste sector.

| No. | Mitigation Measure | Reference Technology | Sub-Sector               | Economic Cost Inputs and Assumptions of Mitigation Measure | References for Economic Costs | Economic Cost Inputs and Assumptions of Reference Technology | References for Economic Costs |
|-----|--------------------|----------------------|--------------------------|------------------------------------------------------------|-------------------------------|--------------------------------------------------------------|-------------------------------|
| 1   | Diversion-LR       | N/A                  | Residential              | Assumed zero                                               | -                             | N/A                                                          | -                             |
| 2   | Diversion-MUR      | N/A                  | Residential              | Assumed zero                                               | -                             | N/A                                                          | -                             |
| 3   | Diversion-C/I      | N/A                  | Commercial/Institutional | Assumed zero                                               | -                             | N/A                                                          | -                             |

**Table S9.** Cost-Effectiveness and GHG Abatement of Mitigation Measures in the Waste Sector.

| No. | Mitigation Measure | Cost-Effectiveness 2012 (\$/tCO <sub>2</sub> ) | GHG Abatement Assumptions                                                                                                  | References for Abatement Assumptions                | GHG Abatement Assumptions in 2020 | GHG Abatement in 2020 (tCO <sub>2</sub> ) | GHG Abatement Assumptions in 2050 | GHG Abatement in 2050 (tCO <sub>2</sub> ) |
|-----|--------------------|------------------------------------------------|----------------------------------------------------------------------------------------------------------------------------|-----------------------------------------------------|-----------------------------------|-------------------------------------------|-----------------------------------|-------------------------------------------|
| 1   | Diversion - SF     | 0                                              | Applicable to low-rising housing in the residential building stock.<br>1% annual increase in diversion rate.               | Abatement in target years obtained from METRO model | 73% diversion                     | 21,695                                    | 100% diversion                    | 283,951                                   |
| 2   | Diversion - MUR    | 0                                              | Applicable to multi-unit residential housing in the residential building stock.<br>1.4% annual increase in diversion rate. | Abatement in target years obtained from METRO model | 33% diversion                     | 27,361                                    | 75% diversion                     | 202,185                                   |
| 3   | Diversion - C/I    | 0                                              | Applicable to commercial/institutional establishments<br>1% annual increase in diversion rate.                             | Abatement in target years obtained from METRO model | 22% diversion                     | 108,626                                   | 52% diversion                     | 801,759                                   |

## References

1. OPA (Ontario Power Authority), Integrated Power System Plan. Exhibit G, Tab 2, Schedule 1. Ministry of Energy, Canada, 2008. Available online: [http://www.ontarioenergyboard.ca/documents/cases/EB-2007-0707/exhibits\\_issues/exhibit\\_5\\_pollution\\_probe\\_20080115.pdf.pdf](http://www.ontarioenergyboard.ca/documents/cases/EB-2007-0707/exhibits_issues/exhibit_5_pollution_probe_20080115.pdf.pdf) (accessed on 14 March 2016)
2. IPCC. Climate change 2014: Mitigation of climate change. In *Contribution of Working Group III to the Fifth Assessment Report of the Intergovernmental Panel on Climate Change*, Edenhofer, O., R. Pichs-Madruga, Y. Sokona, E., Farahani, S., Kadner, K., Seyboth, A., Adler, I., Baum, S., Brunner, P., Eickemeier, B., et al., Eds.; Cambridge University Press: Cambridge, UK; New York, NY, USA, 2014.
3. Achieving Balance: Ontario's Long-Term Energy Plan, Ontario; 2013. Available online: [http://www.energy.gov.on.ca/en/files/2014/10/LTEP\\_2013\\_English\\_WEB.pdf](http://www.energy.gov.on.ca/en/files/2014/10/LTEP_2013_English_WEB.pdf) (accessed on 14 March 2016)
4. Bristow, D. Buildings Scale Alternative Energy: A Comparative Analysis & Economic Model for the Ontario Case. Master's Thesis, University of Toronto, Toronto, ON, Canada, 2009.
5. SEIA (Solar Energy Industries Association), 2015. Available online: <http://www.seia.org/policy/environment/pv-recycling> (accessed on 14 March 2016).
6. Renewable Energy World, 2014. Available online: <http://www.renewableenergyworld.com/rea/blog/post/print/2014/04/building-integrated-solar-air-heating-systems-proving-popular> (accessed on 14 March 2016).
7. Furnace Prices. Canadian Furnace Prices. 2015. Available online: <http://www.furnaceprices.ca/> (accessed on 14 March 2016).
8. ASHRAE Equipment Life Expectancy Chart. 2013. Available online: [http://www.f22designs.com/cullum/wpcontent/uploads/2013/02/ASHRAE\\_Chart\\_HVAC\\_Life\\_Expectancy%201.pdf](http://www.f22designs.com/cullum/wpcontent/uploads/2013/02/ASHRAE_Chart_HVAC_Life_Expectancy%201.pdf) (accessed on 14 March 2016).
9. Toronto Hydro. Appliance Usage Chart. 2015. Available online: <https://www.torontohydro.com/sites/electricsystem/residential/yourbilloverview/Pages/ApplianceChart.aspx> (accessed on 14 March 2016).
10. Heat Pump Price Guides. Heat Pump Price Comparison Guides. 2014. Available online: <http://www.heatpumppriceguides.com/> (accessed on 14 March 2016).
11. York Commercial Furnaces. 2015. Available online: <http://www.york.com/residential/products/furnaces/commercial-gy8s-e-furnace.aspx> (accessed on 14 March 2016).
12. Solar Consultants. Considerations in Choosing a Backup Water Heating System. 2009. Available online: [http://www.solarconsultants.com/library/backup\\_wh\\_options.pdf](http://www.solarconsultants.com/library/backup_wh_options.pdf) (accessed on 14 March 2016).
13. Manitoba Hydro, 2015. [https://www.hydro.mb.ca/your\\_home/solar\\_water\\_heating/collectors.shtml](https://www.hydro.mb.ca/your_home/solar_water_heating/collectors.shtml) (accessed on 14 March 2016).
14. Global Energy Partners, 2005. Electric Tankless Water Heating: Competitive Assessment. With costing data from RS Means Buildings Construction Cost Data. Available online: [http://www.energystar.gov/ia/partners/prod\\_development/new\\_specs/downloads/water\\_heaters/ElectricTanklessCompetitiveAssessment.pdf](http://www.energystar.gov/ia/partners/prod_development/new_specs/downloads/water_heaters/ElectricTanklessCompetitiveAssessment.pdf) (accessed on 14 March 2016).
15. Rheem, 2015. Available online: [http://www.rheem.com/products/commercial/water\\_heating/commercial\\_gas/](http://www.rheem.com/products/commercial/water_heating/commercial_gas/) (accessed on 14 March 2016).
16. Home Depot US. Residential Electric Water Heaters. 2015. Available online: <http://www.homedepot.com/b/Plumbing-Water-Heaters-Residential-Electric/N-5yc1vZc1u1Z12le?NCNI-5#> (accessed on 14 March 2016).
17. Home Depot US. Residential Gas Water Heaters. 2015. Available online: <http://www.homedepot.com/b/Plumbing-Water-Heaters-Residential-Gas/N-5yc1vZc1tzZ12le?NCNI-5> (accessed on 14 March 2016).
18. Home Depot US. Commercial Gas Water Heaters. 2015. Available online: <http://www.homedepot.com/b/Plumbing-Water-Heaters-Commercial-Commercial-Gas-Water-Heaters/N-5yc1vZc74l> (accessed on 14 March 2016).
19. Imperial College, 2014. Available online: [http://www3.imperial.ac.uk/newsandeventspggrp/imperialcollege/newssummary/news\\_20-2-2014-9-18-49](http://www3.imperial.ac.uk/newsandeventspggrp/imperialcollege/newssummary/news_20-2-2014-9-18-49) (accessed on 14 March 2016).
20. Energy Star Hot water use at home. Available online: [https://www.energystar.gov/ia/new\\_homes/features/WaterHtrs\\_062906.pdf](https://www.energystar.gov/ia/new_homes/features/WaterHtrs_062906.pdf) (accessed on 14 March 2016).
21. Lowe's. When to Replace a Water Heater. 2015. Available online: <http://www.lowes.com/projects/repair-and-maintain/when-to-replace-a-water-heater/project> (accessed on 14 March 2016).
22. Pro Water Heater Supply. Whole House Tankless. 2015. Available online: <http://www.prowaterheater.com/shop-by-category/bosch-whole-house-tankless-water-heaters.html?p=1> (accessed on 14 March 2016).

23. GE (General Electric). ENERGY STAR Appliances. 2015. Available online: <http://www.geappliances.com/energy-star-appliances/> (accessed on 14 March 2016).
24. NRC (Natural Resources Canada). Look for ENERGY STAR. 2011. Available online: [http://www.nrcan.gc.ca/sites/oe.nrcan.gc.ca/files/files/pdf/residential/business/v6\\_eng.pdf](http://www.nrcan.gc.ca/sites/oe.nrcan.gc.ca/files/files/pdf/residential/business/v6_eng.pdf) (accessed on 14 March 2016).
25. Average Life Span of Homes, Appliances, and Mechanicals. 2015. Available online: <http://www.atdho.meinspection.com/advice/average-product-life/> (accessed on 14 March 2016).
26. ENERGY STAR Market & Industry Scoping Report, Residential Clothes Dryers, November 2011. Available online: [http://www.energystar.gov/ia/products/downloads/ENERGY\\_STAR\\_Scoping\\_Report\\_Residential\\_Clothes\\_Dryers.pdf](http://www.energystar.gov/ia/products/downloads/ENERGY_STAR_Scoping_Report_Residential_Clothes_Dryers.pdf) (accessed on 14 March 2016).
27. Dryer Buying Guide. 2013. Available online: <http://www.cnet.com/topics/dryers/buying-guide/> (accessed on 14 March 2016).
28. Earth Easy. LED Light Bulbs: Comparison Charts. 2015. Available online: [http://eartheasy.com/live\\_led\\_bulbs\\_comparison.html](http://eartheasy.com/live_led_bulbs_comparison.html) (accessed on 14 March 2016).
29. Home Depot Canada. 12W LED. 2015. Available online: <http://www.homedepot.ca/product/led-12w-a-line-daylight/826492> (accessed on 14 March 2016).
30. Home Depot US. 65W incandescent. 2015. Available online: <http://www.homedepot.com/p/Philips-65-Watt-Incandescent-BR30-Flood-Light-Bulb-12-Pack-248872/100560688> (accessed on 14 March 2016).
31. Comparison Chart: LED Lights vs. Incandescent Light Bulbs vs. CFLs. 2015. Available online: <http://www.designrecycleinc.com/led%20comp%20chart.html> (accessed on 14 March 2016).
32. Research Highlight: Benchmarking Home Energy Savings from Energy-Efficient Lighting, Technical Series 08-101, January 2008. Available online: <http://www.cmhc.ca/odpub/pdf/65830.pdf> (accessed on 14 March 2016).
33. Home Depot US. 100W incandescent. 2015. Available online: <http://www.homedepot.com/p/Philips-100-Watt-Incandescent-A21-250-Volt-Rough-Service-Frosted-Light-Bulb-60-Pack-275503-0/204148596> (accessed on 30 Aug 2015).
34. Sachs, H.; Nadel, S.; Amann, J.; Tuazon, M.; Mendelsohn, E.; Rainer, L.; Todesco, G.; Shipley, D.; Adelaar, M. Emerging Energy-Saving Technologies and Practices for the Building Sector as of 2004. American Council for and Energy Efficient Economy A042. Available online: <http://www.greenbiz.com/sites/default/files/document/CustomO16C45F60305.pdf> (accessed on 14 March 2016).
35. Global Industrial. Commercial Air Conditioners. 2015. Available online: [http://www.globalindustrial.ca/p/hvac/air-conditioning/air-conditioners-commercial/ceiling-air-conditioner-5-ton-42000-btu-water-cooled?infoParam.campaignId=T9F&gclid=Cj0KEQjw9JuuBRC2xPG59dbzkipIBEiQAzv4-G\\_ZhsEKjPMrASNQBRbRL0ujvEZ8dJp2eyUrvwON0G8aAjQl8P8HAQ](http://www.globalindustrial.ca/p/hvac/air-conditioning/air-conditioners-commercial/ceiling-air-conditioner-5-ton-42000-btu-water-cooled?infoParam.campaignId=T9F&gclid=Cj0KEQjw9JuuBRC2xPG59dbzkipIBEiQAzv4-G_ZhsEKjPMrASNQBRbRL0ujvEZ8dJp2eyUrvwON0G8aAjQl8P8HAQ) (accessed on 14 March 2016).
36. TAF (Toronto Atmospheric Fund). Solar Neighbourhoods Pilot Project Findings. 2010. Available online: [http://www.solarneighbourhoods.ca/wrap\\_report.pdf](http://www.solarneighbourhoods.ca/wrap_report.pdf) (accessed on 14 March 2016).
37. Furnace Price Guides. Compare Gas Furnace Prices. 2015. Available online: <http://www.furnacepriceguides.com/gas-furnace/> (accessed on 14 March 2016).
38. Wind Power. 7000 Large Onshore Wind Turbines in Ontario. 2011. Available online: <https://windpowergrab.wordpress.com/> (accessed on 14 March 2016).
39. Energy Star Unit Shipment and Market Penetration Report Calendar Year 2011 Summary. 2012. Available online: [http://www.energystar.gov/ia/partners/downloads/unit\\_shipment\\_data/2011\\_USD\\_Summary\\_Report.pdf?f975-6ad4](http://www.energystar.gov/ia/partners/downloads/unit_shipment_data/2011_USD_Summary_Report.pdf?f975-6ad4) (accessed on 14 March 2016).
40. ENERGY STAR Qualified Products. 2010. Available online: <http://www.hotwater.com/resources/energy-star-qualified-products/> (accessed on 30 Aug 2015).
41. Sugar, L.; Kennedy, C. A low carbon infrastructure plan for Toronto, Canada. *Can. J. Civil Eng.* **2013**, *40*, 86–96.
42. Toronto Hydro. Toronto Community Housing's energy saving investment pays in two ways. 2012. Available online: <http://www.torontohydro.com/sites/electricsystem/electricityconservation/businessconservation/Documents/Toronto%20Community%20Housing%20Corporation.pdf> (accessed on 14 March 2016).
43. Toronto Hydro. Sunrise Records Lighting Retrofit Cuts Costs, Brings New Life to Store. 2012. Available online: [http://www.torontohydro.com/sites/electricsystem/electricityconservation/businessconservation/Documents/SunriseRecords%20CaseStudy\\_FINAL.pdf](http://www.torontohydro.com/sites/electricsystem/electricityconservation/businessconservation/Documents/SunriseRecords%20CaseStudy_FINAL.pdf) (accessed on 14 March 2016).
44. ESP (ESP Lighting). CFL Light bulbs. 2015. Available online: <http://www.esplighting.com/fluorescent-light-bulbs--cfls-.html> (accessed on 30 August 2015).

45. Plug'n Drive. Electric Vehicles. 2015. Available online: <https://www.plugndrive.ca/electric-cars-available-in-canada?page=1> (accessed on 30 Aug 2015).
46. CAA (Canadian Automobile Association). Driving Costs: Beyond the Price Tag Understanding Your Vehicle's Expenses. 2012. Available online: [https://caa.ca/docs/eng/CAA\\_Driving\\_Costs\\_English.pdf](https://caa.ca/docs/eng/CAA_Driving_Costs_English.pdf) (accessed on 14 March 2016).
47. City of Toronto. Transportation Options. 2015. Available online: <http://www1.toronto.ca/wps/portal/contentonly?vgnextoid=d4c1ae0b7e612310VgnVCM1000003dd60f89RCRD&vgnextchannel=4a27ba2ae8b1e310VgnVCM10000071d60f89RCRD> (accessed on 14 March 2016).
48. Effective Fuel Systems. Fuel Enhancement Technologies. 2008. Available online: <http://www.effectivefuel.ca/techpage3.html> (accessed on 14 March 2016).
49. Centre for Climate and Energy Solutions. Medium and Heavy Duty Vehicles. 2015. Available online: <http://www.c2es.org/technology/Medium-and-Heavy-DutyVehicles> (accessed on 14 March 2016).
50. NRC (Natural Resources Canada). Fuel Efficiency Benchmarking in Canada's Trucking Industry. 2015. Available online: <http://www.nrcan.gc.ca/energy/efficiency/transportation/commercial-vehicles/reports/7607> (accessed on 14 March 2016).
51. Transport Canada. Urban Transportation Showcase Program. Case Studies in Sustainable Transportation. Case Study No. 71. 2009. Available online: <http://www.tc.gc.ca/media/documents/programs/cs71e-hybridbuses.pdf> (accessed on 14 March 2016).
52. Toronto Fleet Services. *Green Fleet Plan 2008–2011*; City of Toronto, Toronto, 2008. Available online: <http://www.toronto.ca/legdocs/mmis/2008/gm/bgrd/backgroundfile-10521.pdf> (accessed on 14 March 2016).
53. *City of Toronto Energy and Emissions Inventory and Mapping Report, Draft*; Canadian Urban Institute & Halsall Associates: Toronto, ON, Canada 2013.
